# Supplementary material for: Non-covalent interactions in solid p-C6F4Cl2 and C6F5Cl
Source: Royal Society of Chemistry journal article supplement (doi:10.1039/d4ce01192a), 2025-01-01
Supplement: d4ce01192a1.pdf [file d4ce01192a1.pdf]

**Supporting Information**  
to  
**Non-covalent interactions in solid *p*-C<sub>6</sub>F<sub>4</sub>Cl<sub>2</sub> and C<sub>6</sub>F<sub>5</sub>Cl**  
**Joseph C. Bear, Alexander Rosu-Finsen, and Jeremy K. Cockcroft**

| Table of Contents                                                                                                                                        | Page No. |
|----------------------------------------------------------------------------------------------------------------------------------------------------------|----------|
| <b>Additional Experimental Details</b>                                                                                                                   |          |
| 1. Sample Preparation                                                                                                                                    | S2       |
| 2. DSC Measurements and Analysis                                                                                                                         | S2       |
| 3. VT-PXRD Measurements and Analysis                                                                                                                     | S2       |
| 4. SXD Measurements and Analysis                                                                                                                         | S3       |
| <b>List of Tables</b>                                                                                                                                    |          |
| SXD data on <i>p</i> -C <sub>6</sub> F <sub>4</sub> Cl <sub>2</sub> at 150 K                                                                             |          |
| Table S1a. Crystal data and structure refinement                                                                                                         | S4       |
| Table S1b. Fractional atomic coordinates and <i>U</i> (eq) for all atoms                                                                                 | S5       |
| Table S1c. Anisotropic displacement parameters                                                                                                           | S5       |
| Table S1d. Selected bond lengths                                                                                                                         | S5       |
| SXD data on C <sub>6</sub> F <sub>5</sub> Cl (II) at 200 K                                                                                               |          |
| Table S2a. Crystal data and structure refinement                                                                                                         | S6       |
| Table S2b. Fractional atomic coordinates and <i>U</i> (eq) for all atoms                                                                                 | S7       |
| Table S2c. Anisotropic displacement parameters                                                                                                           | S7       |
| Table S2d. Selected bond lengths                                                                                                                         | S7       |
| SXD data on C <sub>6</sub> F <sub>5</sub> Cl (III) at 150 K                                                                                              |          |
| Table S3a. Crystal data and structure refinement                                                                                                         | S8       |
| Table S3b. Fractional atomic coordinates and <i>U</i> (eq) for all atoms                                                                                 | S9       |
| Table S3c. Anisotropic displacement parameters                                                                                                           | S9       |
| Table S3d. Selected bond lengths                                                                                                                         | S9       |
| Table S4. Summary of cell parameters and molecular volumes for C <sub>6</sub> F <sub>5</sub> Cl                                                          | S10      |
| <b>List of Figures</b>                                                                                                                                   |          |
| Figure S1. First set of raw VT-PXRD data on C <sub>6</sub> F <sub>5</sub> Cl                                                                             | S11      |
| Figure S2. Second set of raw VT-PXRD data on C <sub>6</sub> F <sub>5</sub> Cl                                                                            | S12      |
| Figure S3. Second set of VT-PXRD data on C <sub>6</sub> F <sub>5</sub> Cl viewed as a surface plot                                                       | S12      |
| Figure S4. Photographs of X-ray capillaries containing C <sub>6</sub> F <sub>5</sub> Cl                                                                  | S13      |
| Figure S5. Labels used to identify the atoms in Fig. 3.                                                                                                  | S14      |
| Figure S6. Crystal structure of <i>p</i> -C <sub>6</sub> F <sub>4</sub> Cl <sub>2</sub>                                                                  | S15      |
| Figure S7. Between plane interactions in <i>p</i> -C <sub>6</sub> F <sub>4</sub> Cl <sub>2</sub>                                                         | S15      |
| Figure S8. Within plane interactions in <i>p</i> -C <sub>6</sub> F <sub>4</sub> Cl <sub>2</sub>                                                          | S16      |
| Figure S9. Within plane interactions in C <sub>6</sub> F <sub>5</sub> Cl (III)                                                                           | S17      |
| Figure S10. Within plane interactions in C <sub>6</sub> F <sub>6</sub> (II)                                                                              | S18      |
| Figure S11. Unit cell changes in C <sub>6</sub> F <sub>5</sub> Cl versus temperature                                                                     | S19      |
| Figure S12. PXRD plots of phases I and II of C <sub>6</sub> F <sub>5</sub> Cl                                                                            | S20      |
| Figure S13. Molecular interactions in <i>p</i> -C <sub>6</sub> F <sub>4</sub> Br <sub>2</sub> and <i>p</i> -C <sub>6</sub> F <sub>4</sub> I <sub>2</sub> | S21      |
| Figure S14. Crystals used in the SXD measurements on <i>p</i> -C <sub>6</sub> F <sub>4</sub> Cl <sub>2</sub> and C <sub>6</sub> F <sub>5</sub> Cl        | S22      |

## Additional Experimental Details

### 1. Sample Preparation

$C_6F_5Cl$  (193666-25g, MW = 202.51, purity 99%) and  $p$ - $C_6F_4Cl_2$  (R62299-50g, MW = 218.96, purity 95%) were purchased from Sigma-Aldrich Ltd. and Manchester Organics, respectively. Given the relatively low purity of  $p$ - $C_6F_4Cl_2$ , about 3 g of the solid material was dissolved in excess  $C_6F_6$  (Sigma-Aldrich Ltd., H8706-100g, MW = 186.05, purity 99%), and filtered under gravity through cotton wool to remove insoluble material. The filtrate was then left in an open bottle for the  $C_6F_6$  to evaporate leaving behind large clear crystals of  $p$ - $C_6F_4Cl_2$ .

### 2. DSC Measurements and Analyses

21.32 mg of  $p$ - $C_6F_4Cl_2$  was weighed (using a Mettler 5 digit balance) into an aluminium sample pan (nominal mass 50  $\mu$ g), which was quickly sealed with a crimped lid. The sample pan was then loaded into a PerkinElmer DSC8000 calorimeter at +25 °C. A helium purge gas was used for all experiments (40 mL min<sup>-1</sup>). For  $C_6F_5Cl$ , 16.24 mg was weighed out and the same procedure adopted.

For  $p$ - $C_6F_4Cl_2$ , which is solid at room temperature, the sample was heated to 60 °C into the liquid phase prior to the cooling ramp at 10 °C min<sup>-1</sup> to -180 °C; the sample was held isothermally for 4 min at -180 °C prior to the heating ramp to 80 °C, the latter chosen to ensure a complete transition to the liquid state. For  $C_6F_5Cl$ , the sample was initially cooled to -180 °C and then heated back to 25 °C. Prior to the cooling or heating ramp at 10 °C min<sup>-1</sup>, the sample was held isothermally for 4 min.

Raw DSC data in units of mW is readily converted to DSC data in kJ K<sup>-1</sup> mol<sup>-1</sup> by dividing by the DSC heating rate and the molar quantity of material present. Data is shown in Fig. 1. Subsequent data analysis to determine both peak maxima and peak area used the Pyris Thermal Analysis software (version 11.1.1.0492) from PerkinElmer.

### 3. VT-PXRD Measurements and Analyses

A small amount of  $C_6F_5Cl$  was pipetted into the sealed end of an X-ray capillary (nominal  $\varnothing$  1 mm), shaken to one end, and then carefully flame-sealed. VT-PXRD measurements were performed using a Stoe Stadi-P diffractometer equipped with a Cu anode, Ge<111> monochromator, a Dectris Mythen 1K detector, and an Oxford Instruments CryojetHT (90-500 K).

$C_6F_5Cl$  was quenched initially at about 150 K to a white powder and then cooled *in situ* to 90 K. PXRD patterns were obtained on heating in 10 K intervals from 90 K to 300 K. The detector was scanned in  $2\theta$  from 0° to 65° in steps of 0.5° at 10 s per step, a complete scan lasting approx. 30 min; each 10 K temperature change took approx. 7-10 min and the sample was equilibrated at the set temperature for 5 min before starting the next scan. The data are shown in Figs. 2 and S1. As  $C_6F_5Cl$  showed an unexpected phase transition at about 250 K, a repeat experiment was performed 2 weeks later on the same capillary for the temperature range 100 K to 260 K (Figs. S2 and S3).

Given the difference between the two sets of data, the VT-PXRD experiments were repeated with a fresh sample. Initially, phase I of  $C_6F_5Cl$  remained elusive until the sample was flash-

cooled from the melt by pre-cooling the CryojetHT to below 150 K, and then moving it into position over the capillary, the whole procedure taking less than 10 s. This procedure resulted in a whiter looking sample (see Fig. S4) and, on heating back to 250 K, the appearance of peaks due to phase I. This procedure resulted in phase I being observed routinely. By contrast, slow cooling resulted in a greyer looking sample which became transparent close to the melt (see Fig. S4) and which did not transform into phase I on heating to the melt. Sample granularity was evident for all of the VT-PXRD measurements made, even when the sample was flash cooled.

### SXD Measurements and Analysis

For *p*-C<sub>6</sub>F<sub>4</sub>Cl<sub>2</sub>, a crystal was selected from the recrystallized material and mounted on a 0.3 mm loop from Hampton Research (see Fig. S14). The crystal was cooled to 150 K. Given that C<sub>6</sub>F<sub>5</sub>Cl is a liquid at room temperature, a drop of the liquid was transferred to a 0.5 mm capillary and flame sealed. Large crystals of C<sub>6</sub>F<sub>5</sub>Cl were grown *in situ* by repeated gentle melting and freezing of the sample close to the melting point until a dominant single crystal formed. Measurements were made on phase II of C<sub>6</sub>F<sub>5</sub>Cl at 200 K and on phase III at 150 K. Phase I was never observed in our SXD measurements, which is consistent with the behaviour of a sample undergoing slow cooling from the melt in VT-PXRD experiments.

SXD measurements were made using an Agilent Oxford Diffraction SuperNova equipped with a microfocus Cu K $\alpha$  X-ray source and an Atlas CCD detector. Samples were cooled with a Cryojet5<sup>®</sup> developed by Oxford Instruments; the device used for these measurements is the original prototype and the Pt-resistance sensor is located in the copper-block heat exchanger and not in the nozzle of the instrument close to the sample. Thus the temperatures quoted in these SXD experiments should be treated as nominal (despite stability to much better than 0.1 °C). Total collection time (typically 2 hours to 12 hours) for full spheres of data to a resolution of 0.84 Å varied depending on size and quality of crystal, and sample temperature. Data were collected using 1° scan frames in  $\omega$  and reduced using the CrysAlis<sup>Pro</sup> software package (version 1.171.40.57a from Rigaku Oxford Diffraction<sup>1</sup>). The structures were solved using intrinsic phasing by ShelXT<sup>2</sup> and refined by least-squares using ShelXL 2014<sup>3</sup> within the Olex2 program suite.<sup>4</sup> For phase II of C<sub>6</sub>F<sub>5</sub>Cl, 50:50 disorder of F(1) and Cl(1) is imposed by inversion symmetry; in addition, the atomic coordinates and anisotropic displacement parameters for F(1) and Cl(1) were constrained to be equal. Crystal structures are illustrated with the program Mercury from CCDC with thermal ellipsoids shown at 50% probability.<sup>5</sup>

---

<sup>1</sup> <https://www.rigaku.com/en/products/smc/crysalis>

<sup>2</sup> G. M. Sheldrick, *Acta Crystallogr., Sect. A: Found. Adv.*, 2015, **71**, 3–8.

<sup>3</sup> G. M. Sheldrick, *Acta Crystallogr., Sect. C: Struct. Chem.*, 2015, **71**, 3–8.

<sup>4</sup> O. V. Dolomanov, L. J. Bourhis, R. J. Gildea, J. A. K. Howard and H. Puschmann, *J. Appl. Crystallogr.*, 2009, **42**, 339–341.

<sup>5</sup> C. F. Macrae, I. Sovago, S. J. Cottrell, P. T. A. Galek, P. McCabe, E. Pidcock, M. Platings, G. P. Shields, J. S. Stevens, M. Towler and P. A. Wood, *J. Appl. Crystallogr.*, 2020, **53**, 226–235.

**Table S1a.** Crystal data and structure refinement for *p*-C<sub>6</sub>F<sub>4</sub>Cl<sub>2</sub> at 150 K.

|                                                              |                                                                             |
|--------------------------------------------------------------|-----------------------------------------------------------------------------|
| Identification code                                          | exp_2986                                                                    |
| Empirical formula                                            | C <sub>6</sub> Cl <sub>2</sub> F <sub>4</sub>                               |
| Formula weight                                               | 218.96                                                                      |
| Temperature / K                                              | 150                                                                         |
| Crystal system                                               | monoclinic                                                                  |
| Space group                                                  | <i>C</i> 2/ <i>m</i>                                                        |
| <i>a</i> / Å                                                 | 9.0094(4)                                                                   |
| <i>b</i> / Å                                                 | 7.6502(4)                                                                   |
| <i>c</i> / Å                                                 | 5.0908(2)                                                                   |
| $\alpha$ / °                                                 | 90                                                                          |
| $\beta$ / °                                                  | 97.673(4)                                                                   |
| $\gamma$ / °                                                 | 90                                                                          |
| Volume / Å <sup>3</sup>                                      | 347.74(3)                                                                   |
| <i>Z</i>                                                     | 2                                                                           |
| $\rho_{\text{calc}}$ / g cm <sup>-3</sup>                    | 2.091                                                                       |
| $\mu$ / mm <sup>-1</sup>                                     | 8.634                                                                       |
| <i>F</i> (000)                                               | 212.0                                                                       |
| Crystal size / mm <sup>3</sup>                               | 0.283 × 0.251 × 0.194                                                       |
| Radiation                                                    | Cu K $\alpha$ ( $\lambda$ = 1.54184 Å)                                      |
| 2 $\theta$ range for data collection / °                     | 15.252 to 146.282                                                           |
| Index ranges                                                 | -11 ≤ <i>h</i> ≤ 11, -8 ≤ <i>k</i> ≤ 9, -6 ≤ <i>l</i> ≤ 6                   |
| Reflections collected                                        | 1936                                                                        |
| Independent reflections                                      | 368 [ <i>R</i> <sub>int</sub> = 0.0208, <i>R</i> <sub>sigma</sub> = 0.0103] |
| Data/restraints/parameters                                   | 368/0/31                                                                    |
| Goodness-of-fit on <i>F</i> <sup>2</sup>                     | 1.168                                                                       |
| Final <i>R</i> indexes [ <i>I</i> ≥ 2 $\sigma$ ( <i>I</i> )] | <i>R</i> <sub>1</sub> = 0.0220, <i>wR</i> <sub>2</sub> = 0.0596             |
| Final <i>R</i> indexes [all data]                            | <i>R</i> <sub>1</sub> = 0.0221, <i>wR</i> <sub>2</sub> = 0.0596             |
| Largest diff. peak/hole / e Å <sup>-3</sup>                  | 0.26/-0.17                                                                  |

**Table S1b.** Fractional atomic coordinates and equivalent isotropic displacement parameters for *p*-C<sub>6</sub>F<sub>4</sub>Cl<sub>2</sub> at 150 K.  $U_{\text{eq}}$  is defined as  $\frac{1}{3}$  of the trace of the orthogonalised  $U_{ij}$  tensor.

| Atom  | <i>x</i>    | <i>y</i>     | <i>z</i>     | $U(\text{eq}) / \text{\AA}^2$ |
|-------|-------------|--------------|--------------|-------------------------------|
| Cl(1) | 0.23788(5)  | 0            | -0.38996(9)  | 0.0297(2)                     |
| F(1)  | 0.10153(10) | -0.30772(11) | -0.16995(18) | 0.0314(3)                     |
| C(1)  | 0.1071(2)   | 0            | -0.1751(4)   | 0.0212(4)                     |
| C(2)  | 0.05267(15) | -0.15523(18) | -0.0866(3)   | 0.0223(3)                     |

**Table S1c.** Anisotropic displacement parameters for *p*-C<sub>6</sub>F<sub>4</sub>Cl<sub>2</sub> at 150 K. The anisotropic displacement factor exponent has the form:  $-2\pi^2[h^2a^{*2}U_{11}+2hka^*b^*U_{12}+\dots]$ .

| Atom  | $U_{11} / \text{\AA}^2$ | $U_{22} / \text{\AA}^2$ | $U_{33} / \text{\AA}^2$ | $U_{23} / \text{\AA}^2$ | $U_{13} / \text{\AA}^2$ | $U_{12} / \text{\AA}^2$ |
|-------|-------------------------|-------------------------|-------------------------|-------------------------|-------------------------|-------------------------|
| Cl(1) | 0.0260(3)               | 0.0409(4)               | 0.0246(3)               | 0                       | 0.0125(19)              | 0                       |
| F(1)  | 0.0364(5)               | 0.0227(5)               | 0.0372(5)               | -0.0058(4)              | 0.0122(4)               | 0.0050(4)               |
| C(1)  | 0.0186(8)               | 0.0275(10)              | 0.0182(9)               | 0                       | 0.0050(7)               | 0                       |
| C(2)  | 0.0227(6)               | 0.0210(7)               | 0.0229(7)               | -0.0028(5)              | 0.0027(5)               | 0.0025(5)               |

**Table S1d.** Selected bond lengths for *p*-C<sub>6</sub>F<sub>4</sub>Cl<sub>2</sub> at 150 K.

| Atom — Atom              | Length / \AA | Atom — Atom              | Length / \AA |
|--------------------------|--------------|--------------------------|--------------|
| Cl(1) — C(1)             | 1.7110(19)   | C(1) — C(2)              | 1.3831(17)   |
| F(1) — C(2)              | 1.3359(16)   | C(2) — C(2) <sup>2</sup> | 1.379(3)     |
| C(1) — C(2) <sup>1</sup> | 1.3831(17)   |                          |              |

<sup>1</sup> *x*, -*y*, *z*; <sup>2</sup> -*x*, *y*, -*z*

**Table S2a.** Crystal data and structure refinement for C<sub>6</sub>F<sub>5</sub>Cl (II) at 200 K.

|                                                              |                                                                             |
|--------------------------------------------------------------|-----------------------------------------------------------------------------|
| Identification code                                          | exp_2989                                                                    |
| Empirical formula                                            | C <sub>6</sub> ClF <sub>5</sub>                                             |
| Formula weight                                               | 202.51                                                                      |
| Temperature / K                                              | 200                                                                         |
| Crystal system                                               | monoclinic                                                                  |
| Space group                                                  | <i>C2/m</i>                                                                 |
| <i>a</i> / Å                                                 | 9.1116(6)                                                                   |
| <i>b</i> / Å                                                 | 7.7713(6)                                                                   |
| <i>c</i> / Å                                                 | 4.8027(4)                                                                   |
| $\alpha$ / °                                                 | 90                                                                          |
| $\beta$ / °                                                  | 95.977(7)                                                                   |
| $\gamma$ / °                                                 | 90                                                                          |
| Volume / Å <sup>3</sup>                                      | 338.23(4)                                                                   |
| <i>Z</i>                                                     | 2                                                                           |
| $\rho_{\text{calc}}$ / g cm <sup>-3</sup>                    | 1.988                                                                       |
| $\mu$ / mm <sup>-1</sup>                                     | 5.481                                                                       |
| <i>F</i> (000)                                               | 196.0                                                                       |
| Crystal size / mm <sup>3</sup>                               | 0.961 × 0.365 × 0.357                                                       |
| Radiation                                                    | Cu K $\alpha$ ( $\lambda$ = 1.54184 Å)                                      |
| 2 $\theta$ range for data collection / °                     | 19.592 to 145.784                                                           |
| Index ranges                                                 | -11 ≤ <i>h</i> ≤ 11, -9 ≤ <i>k</i> ≤ 9, -5 ≤ <i>l</i> ≤ 5                   |
| Reflections collected                                        | 2160                                                                        |
| Independent reflections                                      | 359 [ <i>R</i> <sub>int</sub> = 0.1277, <i>R</i> <sub>sigma</sub> = 0.0518] |
| Data/restraints/parameters                                   | 359/0/32                                                                    |
| Goodness-of-fit on <i>F</i> <sup>2</sup>                     | 1.084                                                                       |
| Final <i>R</i> indexes [ <i>I</i> ≥ 2 $\sigma$ ( <i>I</i> )] | <i>R</i> <sub>1</sub> = 0.0694, <i>wR</i> <sub>2</sub> = 0.1861             |
| Final <i>R</i> indexes [all data]                            | <i>R</i> <sub>1</sub> = 0.0725, <i>wR</i> <sub>2</sub> = 0.1889             |
| Largest diff. peak/hole / e Å <sup>-3</sup>                  | 0.20/-0.33                                                                  |

**Table S2b.** Fractional atomic coordinates and equivalent isotropic displacement parameters for C<sub>6</sub>F<sub>5</sub>Cl (I) at 200 K.  $U_{\text{eq}}$  is defined as  $\frac{1}{3}$  of the trace of the orthogonalised  $U_{ij}$  tensor.

| Atom                    | $x$       | $y$        | $z$         | $U(\text{eq}) / \text{\AA}^2$ |
|-------------------------|-----------|------------|-------------|-------------------------------|
| Cl(1)/F(1) <sup>†</sup> | 0.2292(2) | 0          | -0.3783(4)  | 0.1069(14)                    |
| F(2)                    | 0.1038(3) | -0.3031(4) | -0.1829(7)  | 0.1096(16)                    |
| C(1)                    | 0.1068(5) | 0          | -0.1789(11) | 0.0731(16)                    |
| C(2)                    | 0.0537(4) | -0.1523(5) | -0.0897(8)  | 0.0750(14)                    |

<sup>†</sup> Occupancy constraints: Cl(1) = F(1) = 0.5

**Table S2c.** Anisotropic displacement parameters for C<sub>6</sub>F<sub>5</sub>Cl (I) at 200 K. The anisotropic displacement factor exponent has the form:  $-2\pi^2[h^2a^*{}^2U_{11}+2hka^*b^*U_{12}+\dots]$ .

| Atom       | $U_{11} / \text{\AA}^2$ | $U_{22} / \text{\AA}^2$ | $U_{33} / \text{\AA}^2$ | $U_{23} / \text{\AA}^2$ | $U_{13} / \text{\AA}^2$ | $U_{12} / \text{\AA}^2$ |
|------------|-------------------------|-------------------------|-------------------------|-------------------------|-------------------------|-------------------------|
| Cl(1)/F(1) | 0.0875(18)              | 0.1560(3)               | 0.0810(18)              | 0                       | 0.0265(11)              | 0                       |
| F(2)       | 0.097(2)                | 0.0788(19)              | 0.149(3)                | -0.0290(15)             | -0.0064(17)             | 0.0241(13)              |
| C(1)       | 0.055(3)                | 0.091(4)                | 0.073(3)                | 0                       | 0.003(2)                | 0                       |
| C(2)       | 0.066(2)                | 0.067(2)                | 0.089(3)                | -0.0095(16)             | -0.0061(17)             | 0.0077(14)              |

**Table S2d.** Selected bond lengths for C<sub>6</sub>F<sub>5</sub>Cl (I) at 200 K.

| Atom — Atom              | Length / \AA | Atom — Atom              | Length / \AA |
|--------------------------|--------------|--------------------------|--------------|
| Cl(1)/F(1) — C(1)        | 1.544(6)     | C(1) — C(2)              | 1.364(5)     |
| F(2) — C(2)              | 1.351(4)     | C(2) — C(2) <sup>2</sup> | 1.370(9)     |
| C(1) — C(2) <sup>1</sup> | 1.364(5)     |                          |              |

<sup>1</sup>  $x, 1-y, z$ ; <sup>2</sup>  $1-x, y, 1-z$

**Table S3a.** Crystal data and structure refinement for C<sub>6</sub>F<sub>5</sub>Cl (III) at 150 K.

|                                                              |                                                                             |
|--------------------------------------------------------------|-----------------------------------------------------------------------------|
| Identification code                                          | exp_2991                                                                    |
| Empirical formula                                            | C <sub>6</sub> ClF <sub>5</sub>                                             |
| Formula weight                                               | 202.51                                                                      |
| Temperature / K                                              | 150                                                                         |
| Crystal system                                               | monoclinic                                                                  |
| Space group                                                  | <i>C2/m</i>                                                                 |
| <i>a</i> / Å                                                 | 9.0176(3)                                                                   |
| <i>b</i> / Å                                                 | 7.6579(3)                                                                   |
| <i>c</i> / Å                                                 | 9.4977(4)                                                                   |
| $\alpha$ / °                                                 | 90                                                                          |
| $\beta$ / °                                                  | 96.562(3)                                                                   |
| $\gamma$ / °                                                 | 90                                                                          |
| Volume / Å <sup>3</sup>                                      | 651.58(4)                                                                   |
| <i>Z</i>                                                     | 4                                                                           |
| $\rho_{\text{calc}}$ / g cm <sup>-3</sup>                    | 2.064                                                                       |
| $\mu$ / mm <sup>-1</sup>                                     | 5.690                                                                       |
| <i>F</i> (000)                                               | 392.0                                                                       |
| Crystal size / mm <sup>3</sup>                               | 0.947 × 0.358 × 0.334                                                       |
| Radiation                                                    | Cu K $\alpha$ ( $\lambda$ = 1.54184 Å)                                      |
| 2 $\theta$ range for data collection / °                     | 9.374 to 146.008                                                            |
| Index ranges                                                 | -11 ≤ <i>h</i> ≤ 11, -9 ≤ <i>k</i> ≤ 9, -11 ≤ <i>l</i> ≤ 11                 |
| Reflections collected                                        | 3896                                                                        |
| Independent reflections                                      | 699 [ <i>R</i> <sub>int</sub> = 0.0472, <i>R</i> <sub>sigma</sub> = 0.0210] |
| Data/restraints/parameters                                   | 699/0/61                                                                    |
| Goodness-of-fit on <i>F</i> <sup>2</sup>                     | 1.083                                                                       |
| Final <i>R</i> indexes [ <i>I</i> ≥ 2 $\sigma$ ( <i>I</i> )] | <i>R</i> <sub>1</sub> = 0.0343, <i>wR</i> <sub>2</sub> = 0.0934             |
| Final <i>R</i> indexes [all data]                            | <i>R</i> <sub>1</sub> = 0.0357, <i>wR</i> <sub>2</sub> = 0.0944             |
| Largest diff. peak/hole / e Å <sup>-3</sup>                  | 0.23/-0.28                                                                  |



**Table S3b.** Fractional atomic coordinates and equivalent isotropic displacement parameters for C<sub>6</sub>F<sub>5</sub>Cl (III) at 150 K.  $U_{\text{eq}}$  is defined as  $\frac{1}{3}$  of the trace of the orthogonalised  $U_{ij}$  tensor.

| Atom  | <i>x</i>     | <i>y</i>   | <i>z</i>    | $U(\text{eq}) / \text{\AA}^2$ |
|-------|--------------|------------|-------------|-------------------------------|
| Cl(1) | 0.23659(6)   | 0          | 0.06092(7)  | 0.0381(3)                     |
| F(1)  | -0.22267(15) | 0          | 0.44435(17) | 0.0440(4)                     |
| F(2)  | -0.11364(12) | 0.3063(14) | 0.35763(14) | 0.0432(3)                     |
| F(3)  | 0.5980(11)   | 0.3074(13) | 0.17847(13) | 0.0399(3)                     |
| C(1)  | -0.1168(2)   | 0          | 0.3570(3)   | 0.0297(5)                     |
| C(2)  | -0.06211(17) | 0.1561(2)  | 0.31181(19) | 0.0287(4)                     |
| C(3)  | 0.04716(17)  | 0.1552(2)  | 0.22167(18) | 0.0270(4)                     |
| C(4)  | 0.1026(2)    | 0          | 0.1747(2)   | 0.0259(5)                     |

**Table S3c.** Anisotropic displacement parameters for C<sub>6</sub>F<sub>5</sub>Cl (III) at 150 K. The anisotropic displacement factor exponent has the form:  $-2\pi^2[h^2a^{*2}U_{11}+2hka^*b^*U_{12}+\dots]$ .

| Atom  | $U_{11} / \text{\AA}^2$ | $U_{22} / \text{\AA}^2$ | $U_{33} / \text{\AA}^2$ | $U_{23} / \text{\AA}^2$ | $U_{13} / \text{\AA}^2$ | $U_{12} / \text{\AA}^2$ |
|-------|-------------------------|-------------------------|-------------------------|-------------------------|-------------------------|-------------------------|
| Cl(1) | 0.0260(3)               | 0.0563(4)               | 0.0341(4)               | 0                       | 0.0127(2)               | 0                       |
| F(1)  | 0.0307(7)               | 0.0671(11)              | 0.0374(9)               | 0                       | 0.0183(6)               | 0                       |
| F(2)  | 0.0415(6)               | 0.0366(6)               | 0.0519(7)               | -0.0114(5)              | 0.0071(5)               | 0.0131(4)               |
| F(3)  | 0.0391(6)               | 0.0279(5)               | 0.0531(7)               | 0.0090(4)               | 0.0073(5)               | -0.0052(4)              |
| C(1)  | 0.0190(9)               | 0.0427(13)              | 0.0282(12)              | 0                       | 0.0068(8)               | 0                       |
| C(2)  | 0.0243(7)               | 0.0284(8)               | 0.0329(9)               | -0.0041(6)              | 0.0017(6)               | 0.0052(6)               |
| C(3)  | 0.0224(7)               | 0.0268(8)               | 0.0315(9)               | 0.0029(6)               | 0.0015(6)               | -0.0021(5)              |
| C(4)  | 0.0179(9)               | 0.0316(11)              | 0.0282(12)              | 0                       | 0.0031(8)               | 0                       |

**Table S3d.** Selected bond lengths for C<sub>6</sub>F<sub>5</sub>Cl (III) at 150 K.

| Atom — Atom              | Length / \AA | Atom — Atom              | Length / \AA |
|--------------------------|--------------|--------------------------|--------------|
| Cl(1) — C(4)             | 1.711(2)     | C(1) — C(2)              | 1.380(2)     |
| F(1) — C(1)              | 1.334(3)     | C(2) — C(3)              | 1.377(3)     |
| F(2) — C(2)              | 1.3318(18)   | C(3) — C(4)              | 1.383(2)     |
| F(3) — C(3)              | 1.3344(18)   | C(4) — C(3) <sup>1</sup> | 1.383(2)     |
| C(1) — C(2) <sup>1</sup> | 1.380(2)     |                          |              |

<sup>1</sup>*x*, 1-*y*, *z*

**Table S4.** Table of lattice parameters obtained from LeBail refinements to the two PXRD data sets shown in Figs. S1 and S2. No unit cell is available for phase I. Percentage molecular volume changes are shown in Fig. 5 for the second set of measurements; points from the first set of data would almost superimpose. The tiny differences in the values obtained from the two data sets is attributable to small systematic errors. The latter are due to the result of performing LeBail fits on data suffering from the effects of sample granularity.

| T / K | Phase | S.G. | Z | a / Å      | b / Å     | c / Å     | $\alpha$ / ° | $\beta$ / ° | $\gamma$ / ° | V / Z / Å <sup>3</sup> |
|-------|-------|------|---|------------|-----------|-----------|--------------|-------------|--------------|------------------------|
| 90    | III   | C2/m | 4 | 8.9806(7)  | 7.6358(5) | 9.4241(7) | 90           | 96.962(5)   | 90           | 160.37(2)              |
| 100   | III   | C2/m | 4 | 8.9886(8)  | 7.6405(5) | 9.4385(7) | 90           | 96.887(5)   | 90           | 160.89(2)              |
| 110   | III   | C2/m | 4 | 8.9901(8)  | 7.6416(6) | 9.4429(7) | 90           | 96.839(5)   | 90           | 161.03(2)              |
| 120   | III   | C2/m | 4 | 8.9953(7)  | 7.6440(5) | 9.4529(7) | 90           | 96.775(4)   | 90           | 161.36(2)              |
| 130   | III   | C2/m | 4 | 8.9999(7)  | 7.6478(5) | 9.4658(7) | 90           | 96.722(5)   | 90           | 161.76(2)              |
| 140   | III   | C2/m | 4 | 9.0055(7)  | 7.6501(5) | 9.4775(7) | 90           | 96.656(4)   | 90           | 162.13(2)              |
| 150   | III   | C2/m | 4 | 9.0130(7)  | 7.6550(5) | 9.4922(7) | 90           | 96.587(5)   | 90           | 162.65(2)              |
| 160   | III   | C2/m | 4 | 9.0173(7)  | 7.6602(5) | 9.5068(7) | 90           | 96.524(5)   | 90           | 163.11(2)              |
| 170   | III   | C2/m | 4 | 9.0266(8)  | 7.6660(5) | 9.5268(7) | 90           | 96.432(6)   | 90           | 163.77(2)              |
| 180   | III   | C2/m | 4 | 9.0393(7)  | 7.6767(5) | 9.5502(8) | 90           | 96.327(7)   | 90           | 164.67(2)              |
| 190   | II    | C2/m | 2 | 9.0844(9)  | 7.7308(6) | 4.7943(4) | 90           | 96.225(5)   | 90           | 167.36(2)              |
| 200   | II    | C2/m | 2 | 9.1099(9)  | 7.7688(7) | 4.8005(4) | 90           | 95.979(6)   | 90           | 168.95(3)              |
| 210   | II    | C2/m | 2 | 9.1271(9)  | 7.8086(6) | 4.8010(4) | 90           | 95.683(5)   | 90           | 170.24(3)              |
| 220   | II    | C2/m | 2 | 9.1440(10) | 7.8514(7) | 4.8052(4) | 90           | 95.397(6)   | 90           | 171.72(3)              |
| 230   | II    | C2/m | 2 | 9.1496(10) | 7.8836(8) | 4.8146(4) | 90           | 95.164(6)   | 90           | 172.94(3)              |
| 240   | II    | C2/m | 2 | 9.1468(10) | 7.9100(9) | 4.8322(4) | 90           | 94.956(6)   | 90           | 174.16(3)              |
| 250   | I     | ?    | ? | ?          | ?         | ?         | ?            | ?           | ?            | ?                      |
| 100   | III   | C2/m | 4 | 8.9857(6)  | 7.6444(4) | 9.4297(5) | 90           | 96.956(4)   | 90           | 160.74(2)              |
| 110   | III   | C2/m | 4 | 8.9953(4)  | 7.6477(4) | 9.4438(5) | 90           | 96.898(3)   | 90           | 161.24(1)              |
| 120   | III   | C2/m | 4 | 8.9995(5)  | 7.6523(4) | 9.4555(4) | 90           | 96.819(3)   | 90           | 161.64(1)              |
| 130   | III   | C2/m | 4 | 9.0045(5)  | 7.6556(4) | 9.4675(4) | 90           | 96.754(4)   | 90           | 162.03(1)              |
| 140   | III   | C2/m | 4 | 9.0139(5)  | 7.6585(4) | 9.4791(4) | 90           | 96.696(4)   | 90           | 162.48(1)              |
| 150   | III   | C2/m | 4 | 9.0176(5)  | 7.6619(4) | 9.4938(4) | 90           | 96.619(3)   | 90           | 162.89(1)              |
| 160   | III   | C2/m | 4 | 9.0263(5)  | 7.6673(4) | 9.5088(4) | 90           | 96.548(3)   | 90           | 163.45(1)              |
| 170   | III   | C2/m | 4 | 9.0315(5)  | 7.6727(4) | 9.5262(5) | 90           | 96.482(4)   | 90           | 163.98(2)              |
| 180   | III   | C2/m | 4 | 9.0424(5)  | 7.6833(4) | 9.5464(5) | 90           | 96.398(4)   | 90           | 164.78(2)              |
| 190   | II    | C2/m | 2 | 9.0889(7)  | 7.7358(5) | 4.7931(3) | 90           | 96.264(5)   | 90           | 167.49(2)              |
| 200   | II    | C2/m | 2 | 9.1107(7)  | 7.7739(5) | 4.7986(2) | 90           | 96.025(5)   | 90           | 168.99(2)              |
| 210   | II    | C2/m | 2 | 9.1294(8)  | 7.8167(5) | 4.8002(3) | 90           | 95.718(6)   | 90           | 170.42(2)              |
| 220   | II    | C2/m | 2 | 9.1447(7)  | 7.8560(5) | 4.8034(2) | 90           | 95.433(5)   | 90           | 171.76(2)              |
| 230   | II    | C2/m | 2 | 9.1481(7)  | 7.8890(5) | 4.8128(3) | 90           | 95.170(5)   | 90           | 172.96(2)              |
| 240   | II    | C2/m | 2 | 9.1406(10) | 7.9189(6) | 4.8298(3) | 90           | 94.941(7)   | 90           | 174.15(2)              |
| 250   | II    | C2/m | 2 | 9.1254(8)  | 7.9413(6) | 4.8558(3) | 90           | 94.752(6)   | 90           | 175.34(2)              |

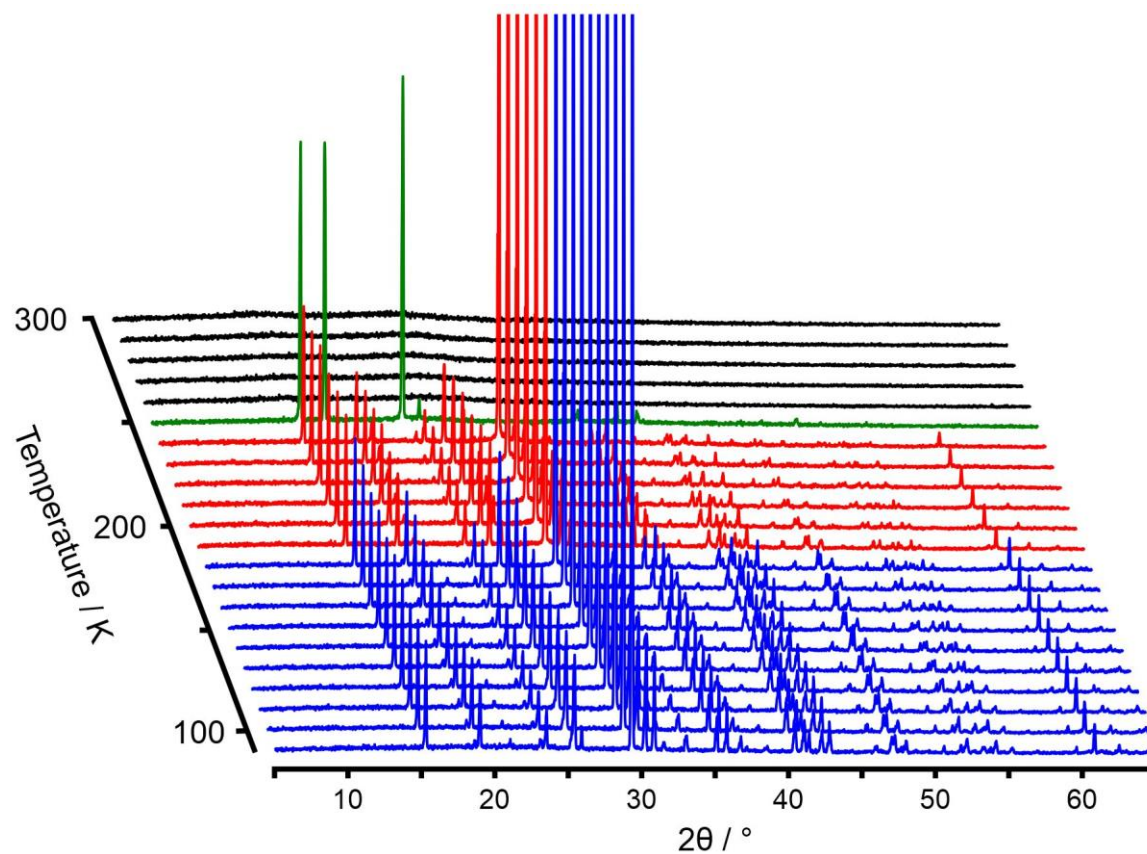

**Fig. S1.** VT-PXRD data on  $C_6F_5Cl$  measured in a 1.0 mm X-ray capillary on a Stoe Stadi-P diffractometer with  $Cu\ K\alpha_1$  radiation as a function of temperature on heating. Phase III is shown in blue, phase II in red, and the elusive phase I in green (with the melt shown in black). The lower temperature patterns in blue have additional weaker peaks relative to the patterns shown in red due to the doubled-size unit cell exhibited by phase III.

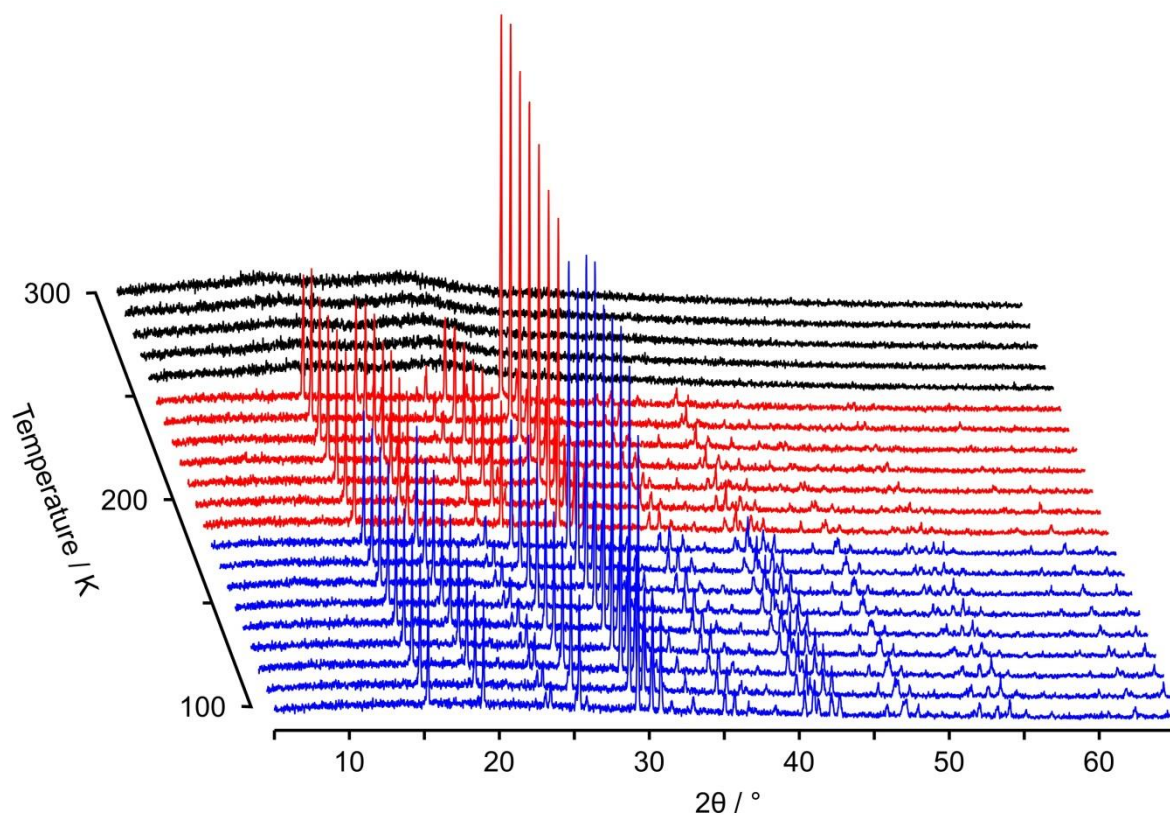

**Fig. S2.** VT-PXRD data on  $C_6F_5Cl$  measured in a 1.0 mm X-ray capillary on a Stoe Stadi-P diffractometer with  $Cu\ K\alpha_1$  radiation as a function of temperature on heating. The colours are the same as for Fig. S1. Notice that phase I is absent from this set of measurements.

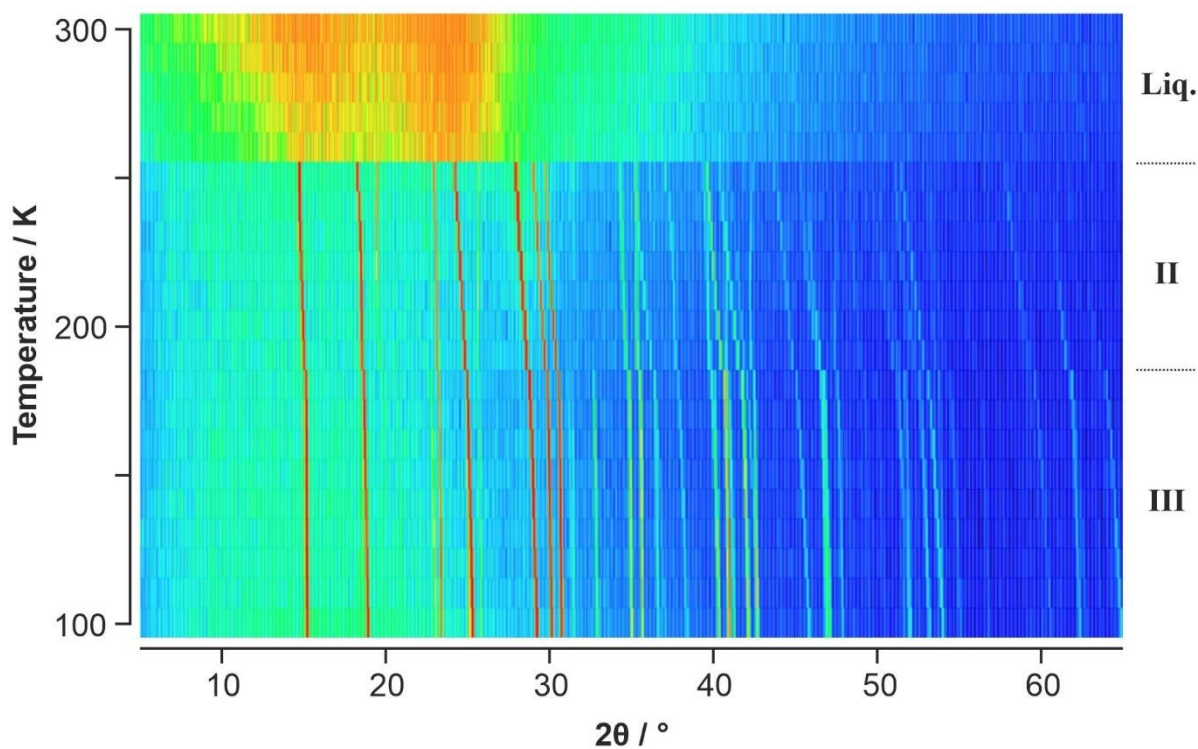

**Fig. S3.** The same VT-PXRD data as for Fig. S2, but now shown as a surface colour plot where the colour scale shows low intensities in the PXRD patterns in blue, intermediate intensities are shown in green/yellow, and high intensities in orange/red.

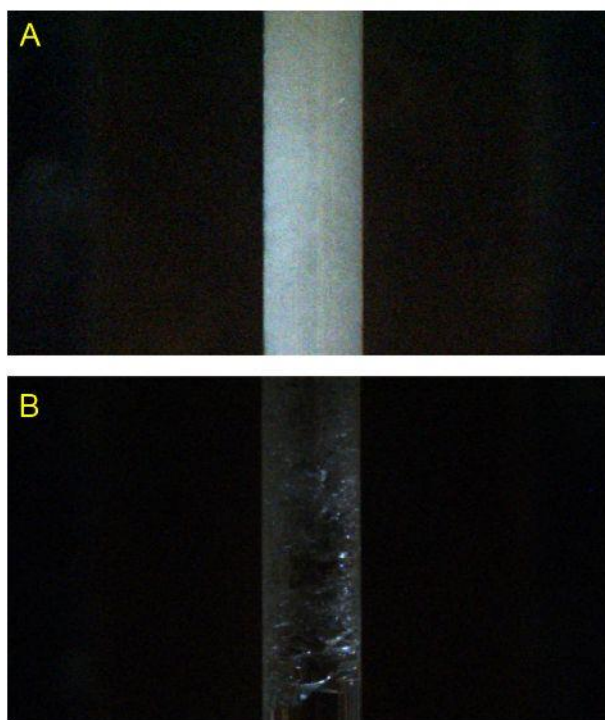

**Fig. S4.** Capillary (nominal  $\varnothing$  1 mm) used in the VT-PXRD study containing  $C_6F_5Cl$ . **A** (*top*) shows the appearance of the sample when flash-frozen; and **B** (*bottom*) shows the same sample slow cooled from the liquid and then reheated to just below the melt (250 K).

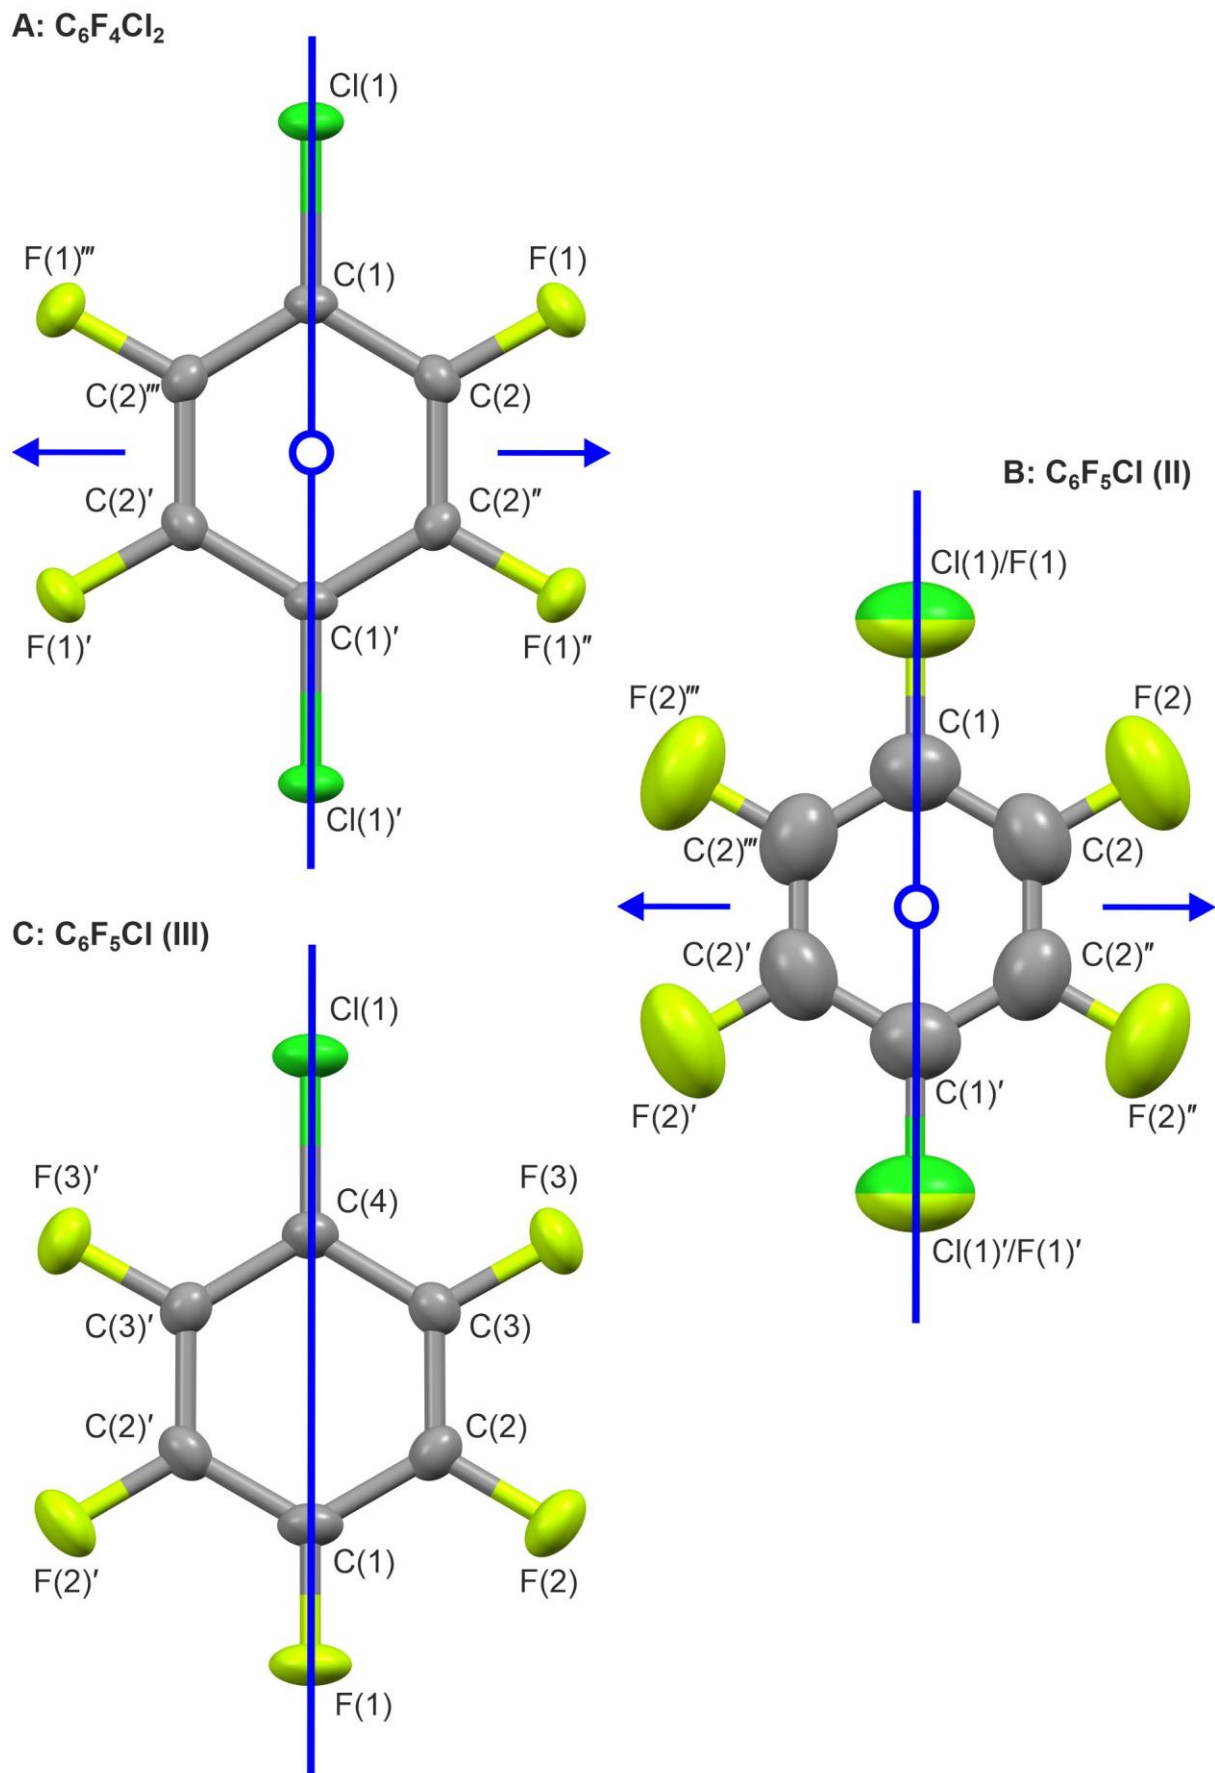

**Fig. S5.** Labels of the atoms used to describe the crystal structures of *p*- $C_6F_4Cl_2$  (**a**) and the two solid-state phases of  $C_6F_5Cl$  (**b**) and (**c**) shown in Fig. 3. Point-group symmetry elements are shown in blue. The prime symbols on labels indicates symmetry-related atoms.

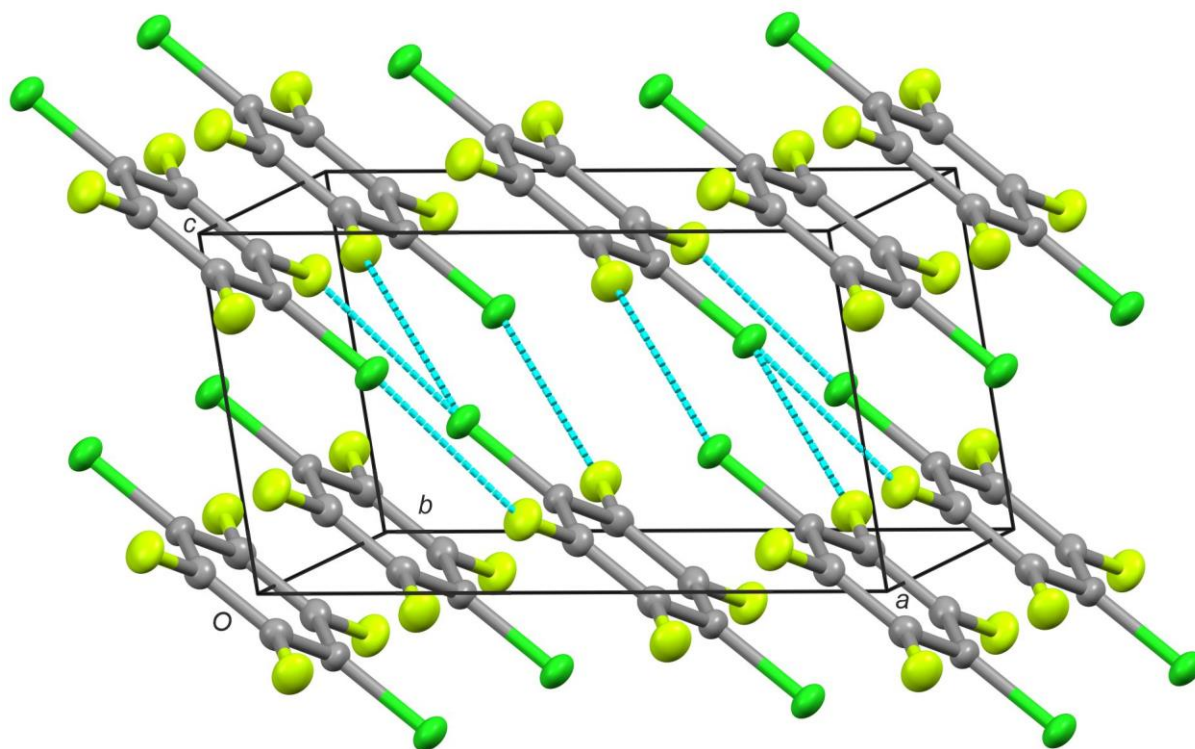

**Fig. S6.** Unit cell of  $p\text{-C}_6\text{F}_4\text{Cl}_2$  (C = grey, F = light green, and Cl = green) showing the structure at 150 K. Thermal ellipsoids are drawn at 50% probability using Mercury.<sup>5</sup> The closest F $\cdots$ Cl contacts, all equal to 3.19 Å, are illustrated with dashed cyan sticks. Closest Cl $\cdots\pi$ (C<sub>6</sub>-ring) contacts are shown in Fig. S7. The molecules are arranged in parallel sheets (see Fig. S8) and not in a classic herringbone structure as exhibited, for example, by benzene.

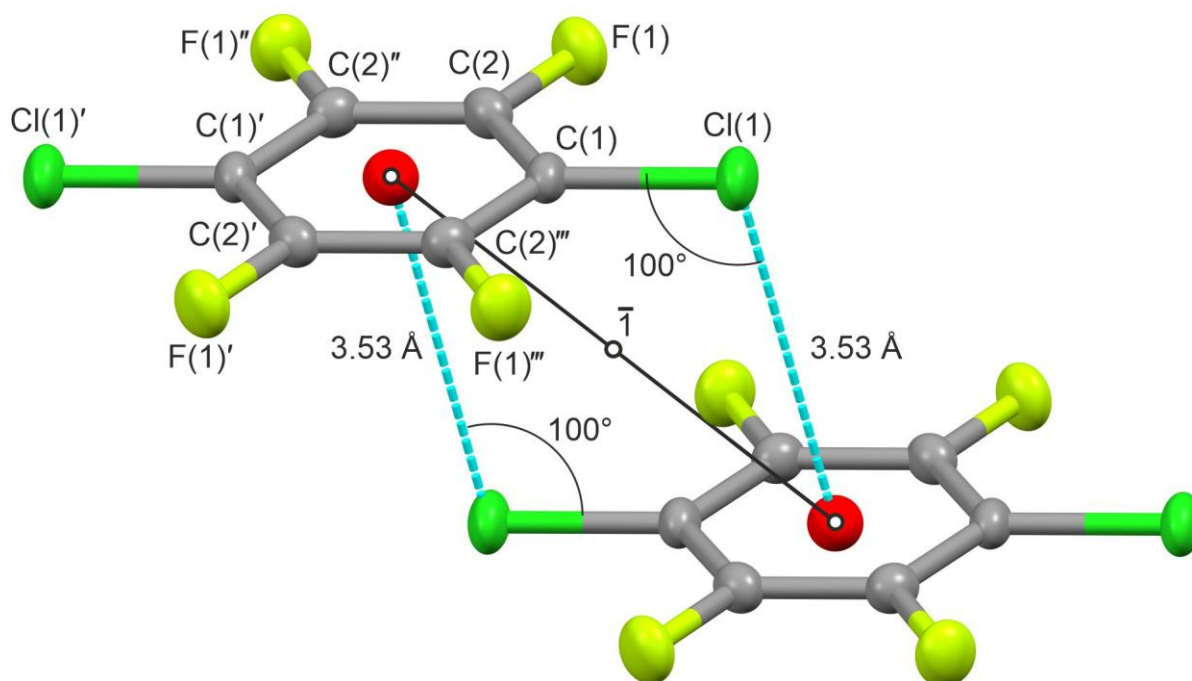

**Fig. S7.** Closest Cl $\cdots\pi$ (C<sub>6</sub>-ring) contacts and inversion symmetry between adjacent interacting molecules in the structure of  $p\text{-C}_6\text{F}_4\text{Cl}_2$  at 150 K. Centre of mass of each molecule is shown with red spheres.

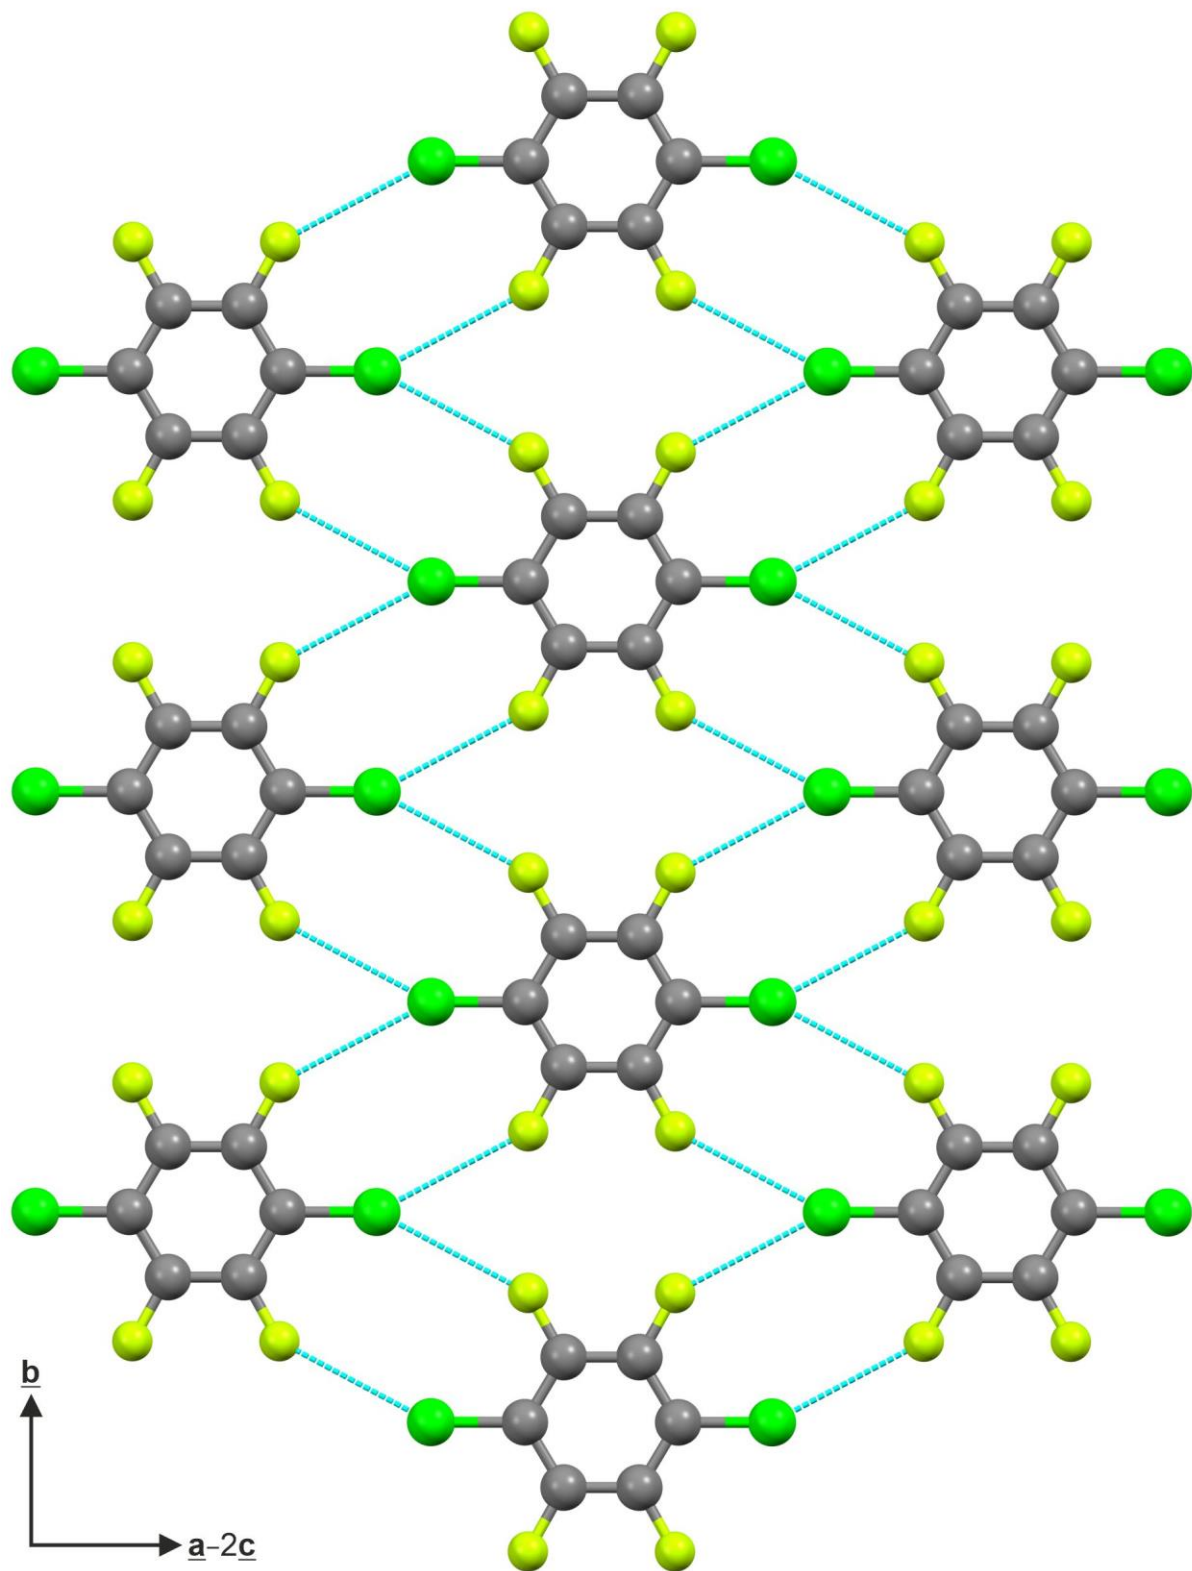

**Fig. S8.** Flat sheet of  $p$ - $C_6F_4Cl_2$  molecules (shown as “ball & stick”) with the network of closest  $F\cdots Cl$  contacts, all equal to 3.19 Å, illustrated with dashed cyan sticks. All molecules lie approximately in the same plane. The interaction of  $p$ - $C_6F_4Cl_2$  molecules from one plane to the next is illustrated in Fig. S7. Similar sheets of molecules are observed in the isomorphous phase II of  $C_6F_5Cl$ , as well as in  $C_6F_5Cl$  in phase III (see Fig. S9).



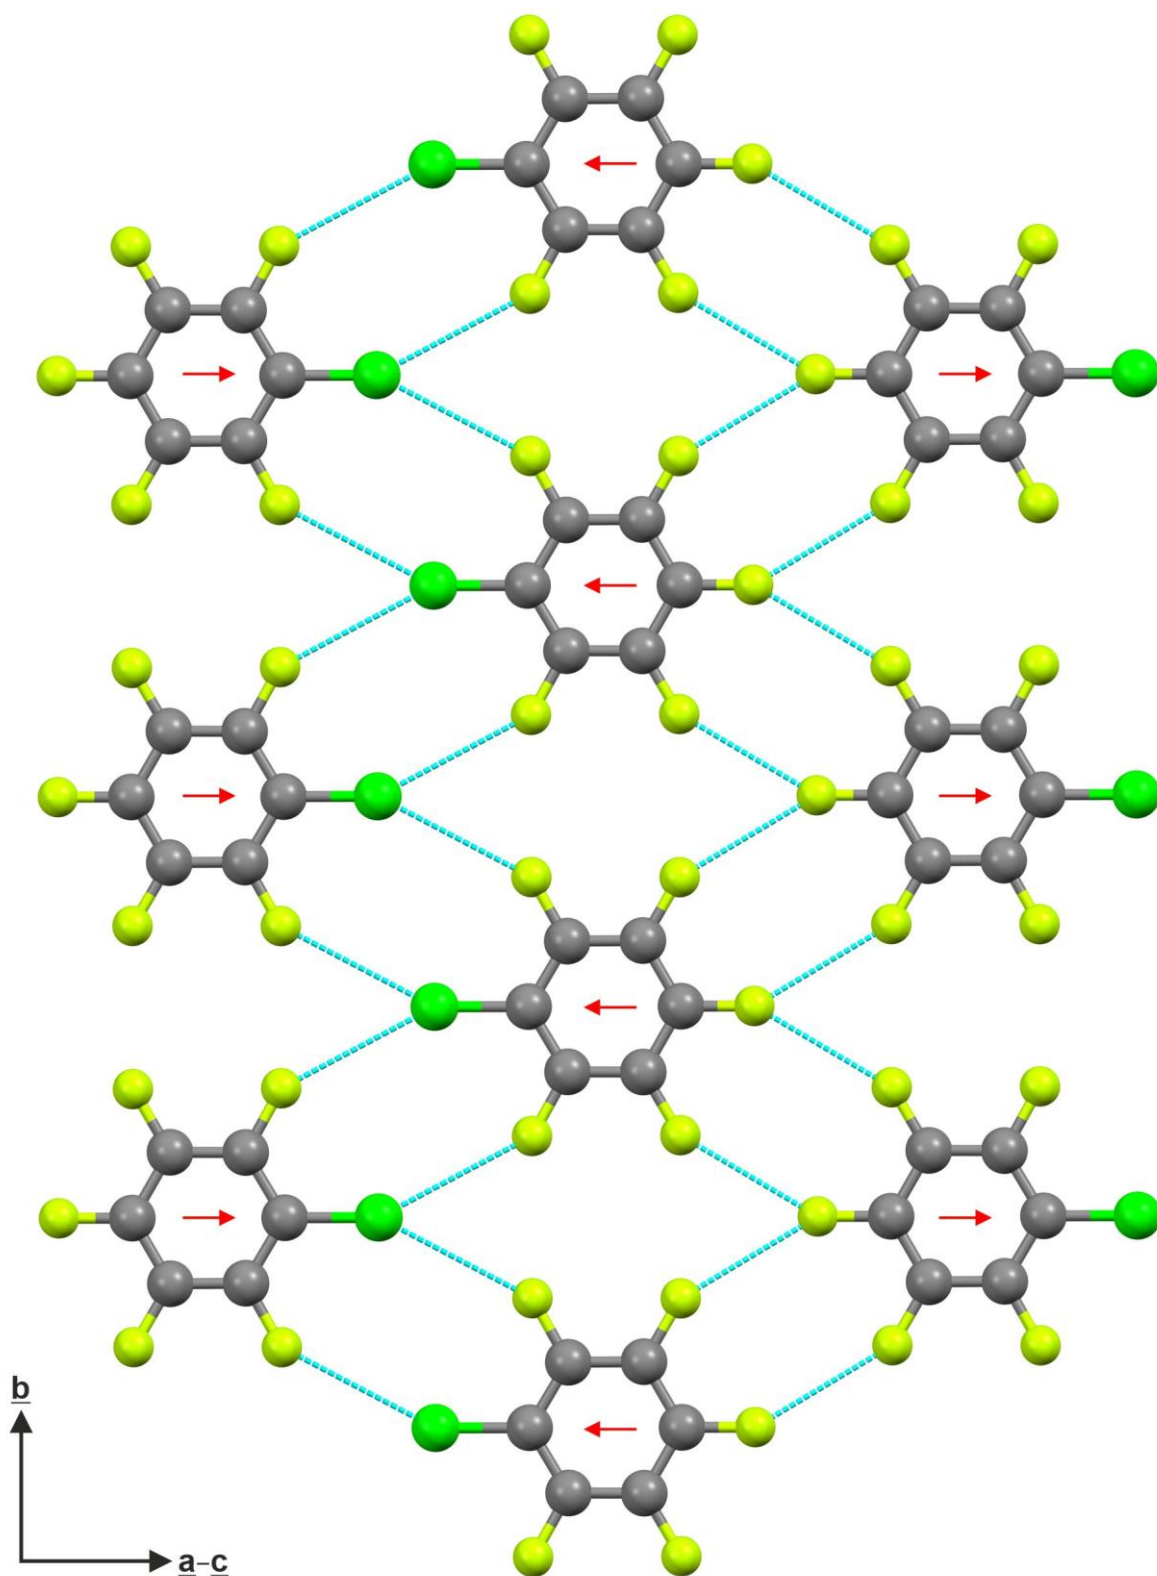

**Fig. S9.** Flat sheet of  $C_6F_5Cl$  molecules in its antiferroelectric phase III (shown as “ball & stick”) with the network of closest  $F\cdots F$  and  $F\cdots Cl$  contacts, equal to 2.92 Å and 3.19 Å, respectively, illustrated with dashed cyan sticks. All molecules lie almost in the same plane, with the molecular electric dipole moments (shown in red) aligned perpendicular both to **b** and approximately co-linear with **a-c**.

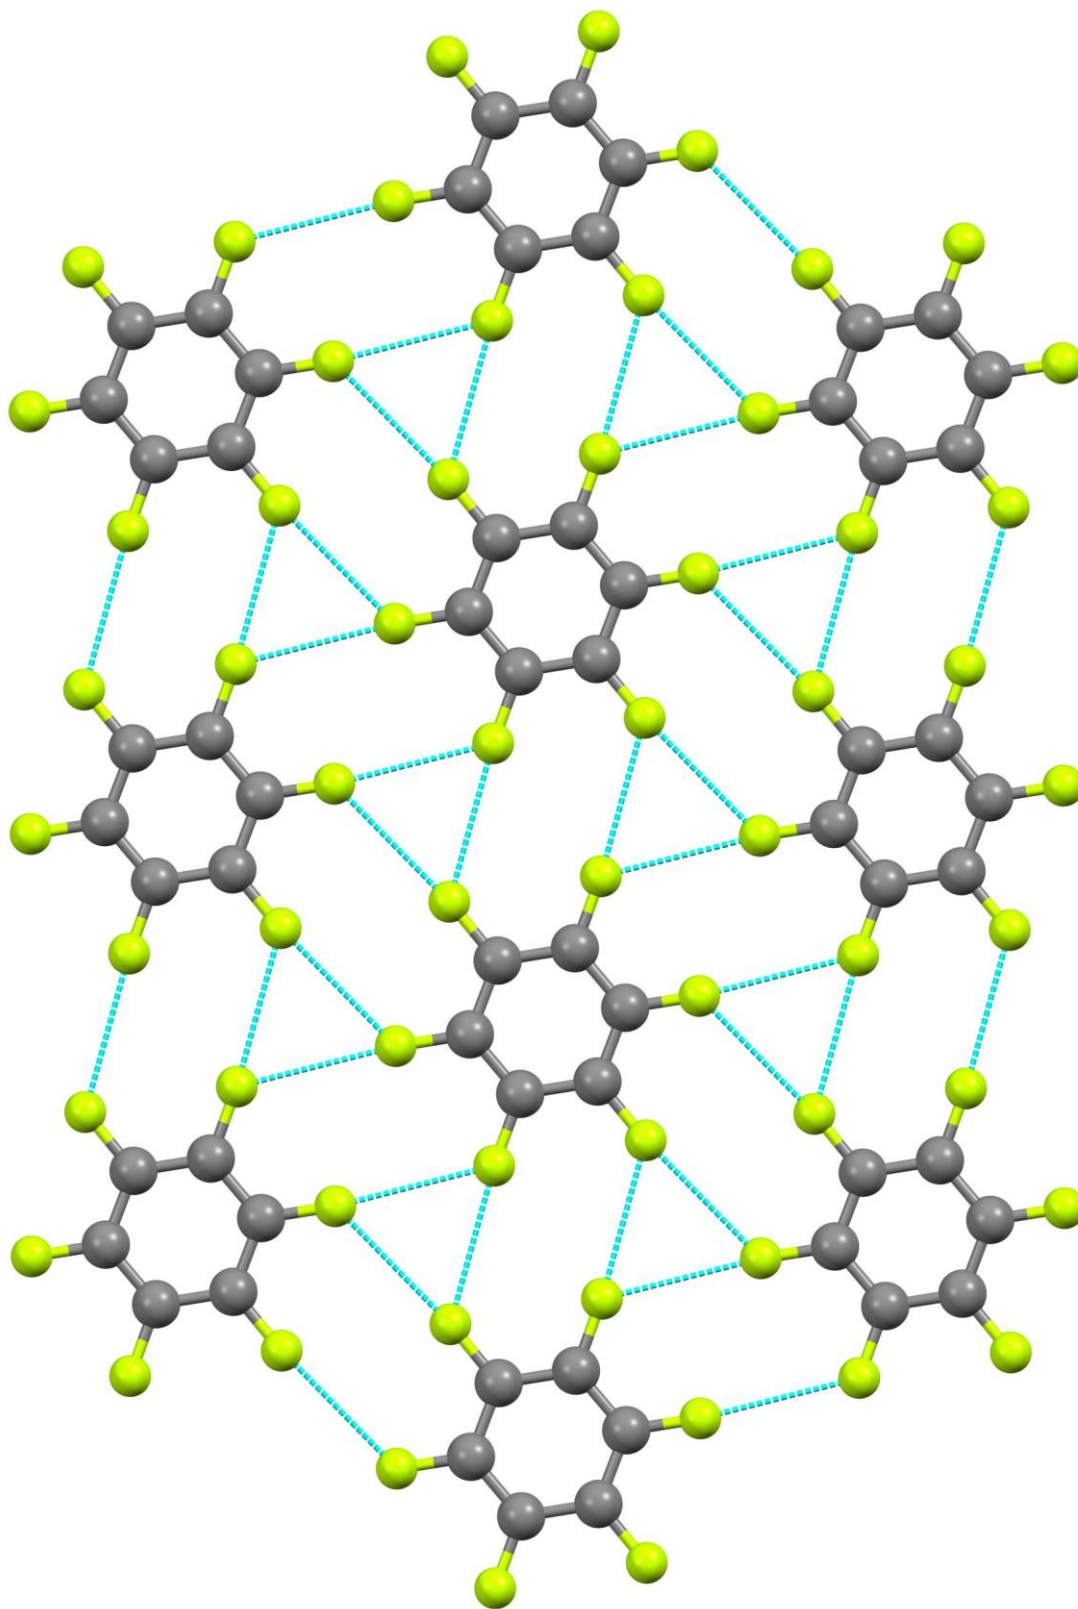

**Fig. S10.** Flat sheet of  $C_6F_6$  molecules in its high-pressure phase II (shown as “ball & stick”) redrawn from CCDC entry HFBENZ15. All molecules lie approximately in the same plane in marked contrast to the arrangement of the molecules in  $C_6F_6$  phase I. In contrast to *p*- $C_6F_4Cl_2$  (Fig. S8) and  $C_6F_5Cl$  (Fig. S9), a rotation of the  $C_6F_6$  molecules about the normal to the  $C_6$ -ring leads to the absence of any mirror symmetry in this structure.

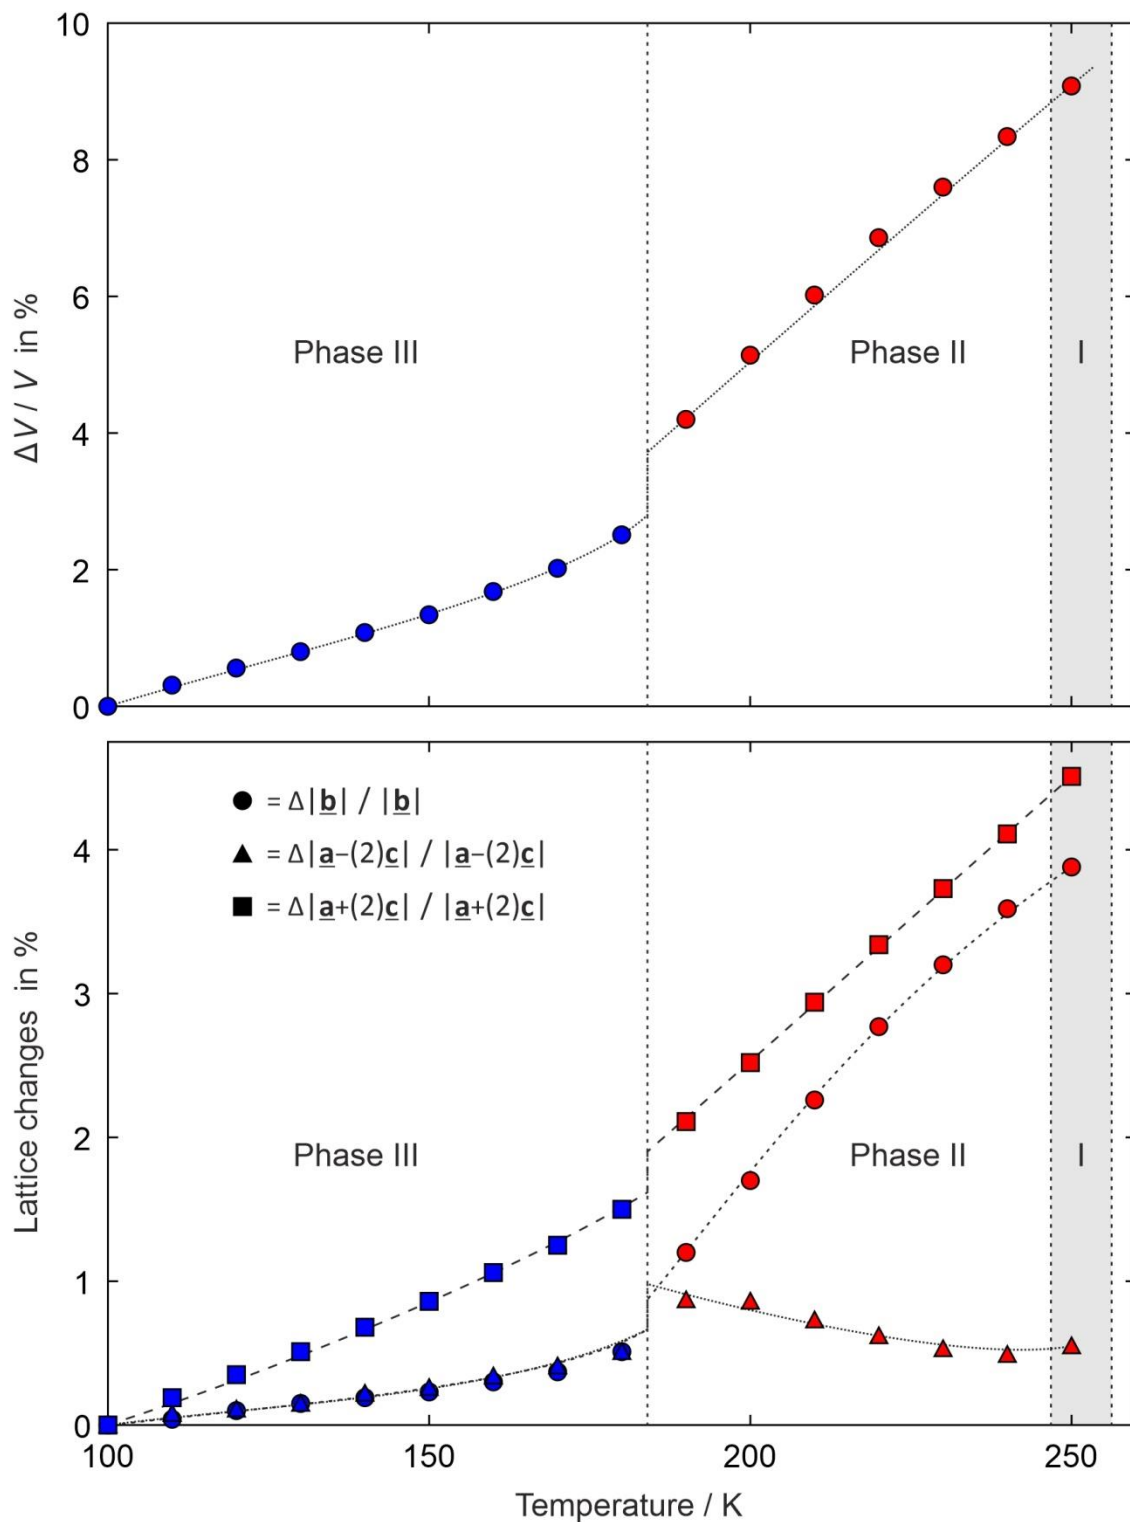

**Fig. S11.** (Top): Percentage change in molecular volume of  $C_6F_5Cl$  as a function of temperature (relative to 100 K) showing the step change in volume between phases II (points in red) and III (points in blue). The dotted lines linking the points are a guide to the eye. Numerical values for the data points (obtained from the results of LeBail fits to the raw VT-PXRD data) are available in Table S4. The grey area indicates the region where earlier DSC had reported an additional phase as seen by us under certain conditions in PXRD. (Bottom): Percentage lattice changes (relative to 100 K) in the thermal expansion of  $C_6F_5Cl$  with respect to the directions  $b$ ,  $a-c$ , and  $a+c$  (for phase III), and  $b$ ,  $a-2c$ , and  $a+2c$  (as  $c$  in phase II is halved relative to phase III). These values are derived readily from the values of  $a$ ,  $c$ , and  $\beta$  given in Table S4 using the cosine rule.

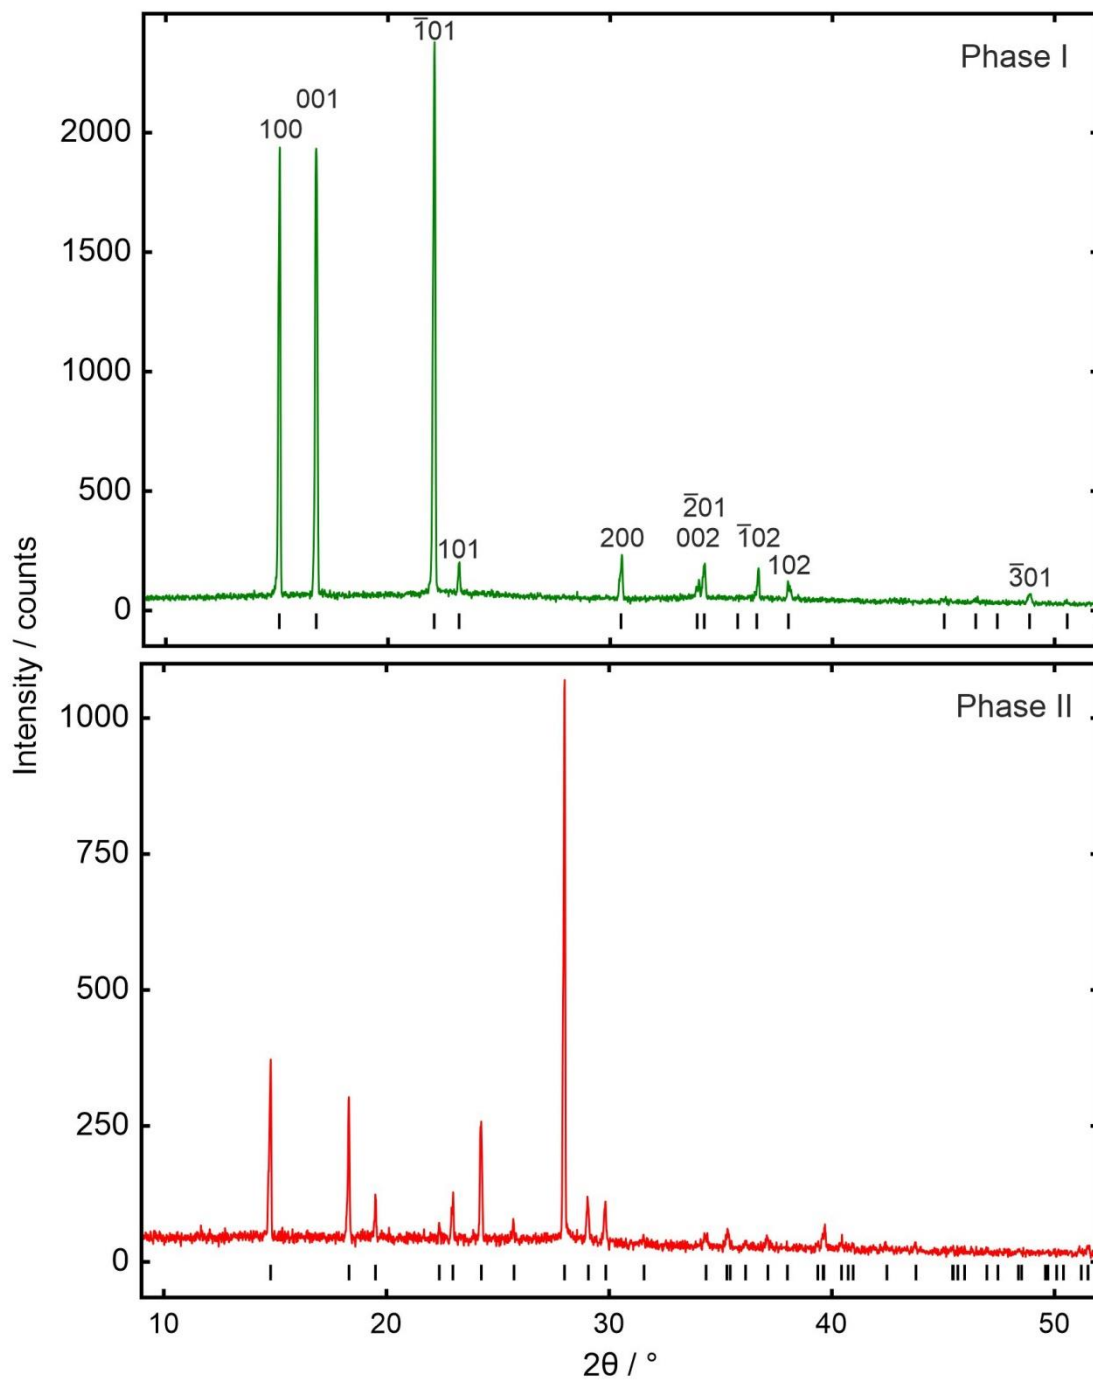

**Fig. S12.** PXRD data on phases I (*top*) and II (*bottom*) of  $C_6F_5Cl$  at 250 K. Indexing of phase II matches the unit cell determined from the SXD studies. Visible peaks in phase I may be indexed as  $h0l$  reflections as shown where the tick marks are calculated for a 2-D lattice with  $a = 5.867 \text{ \AA}$ ,  $c = 5.289 \text{ \AA}$ , and  $\beta = 92.81^\circ$ .

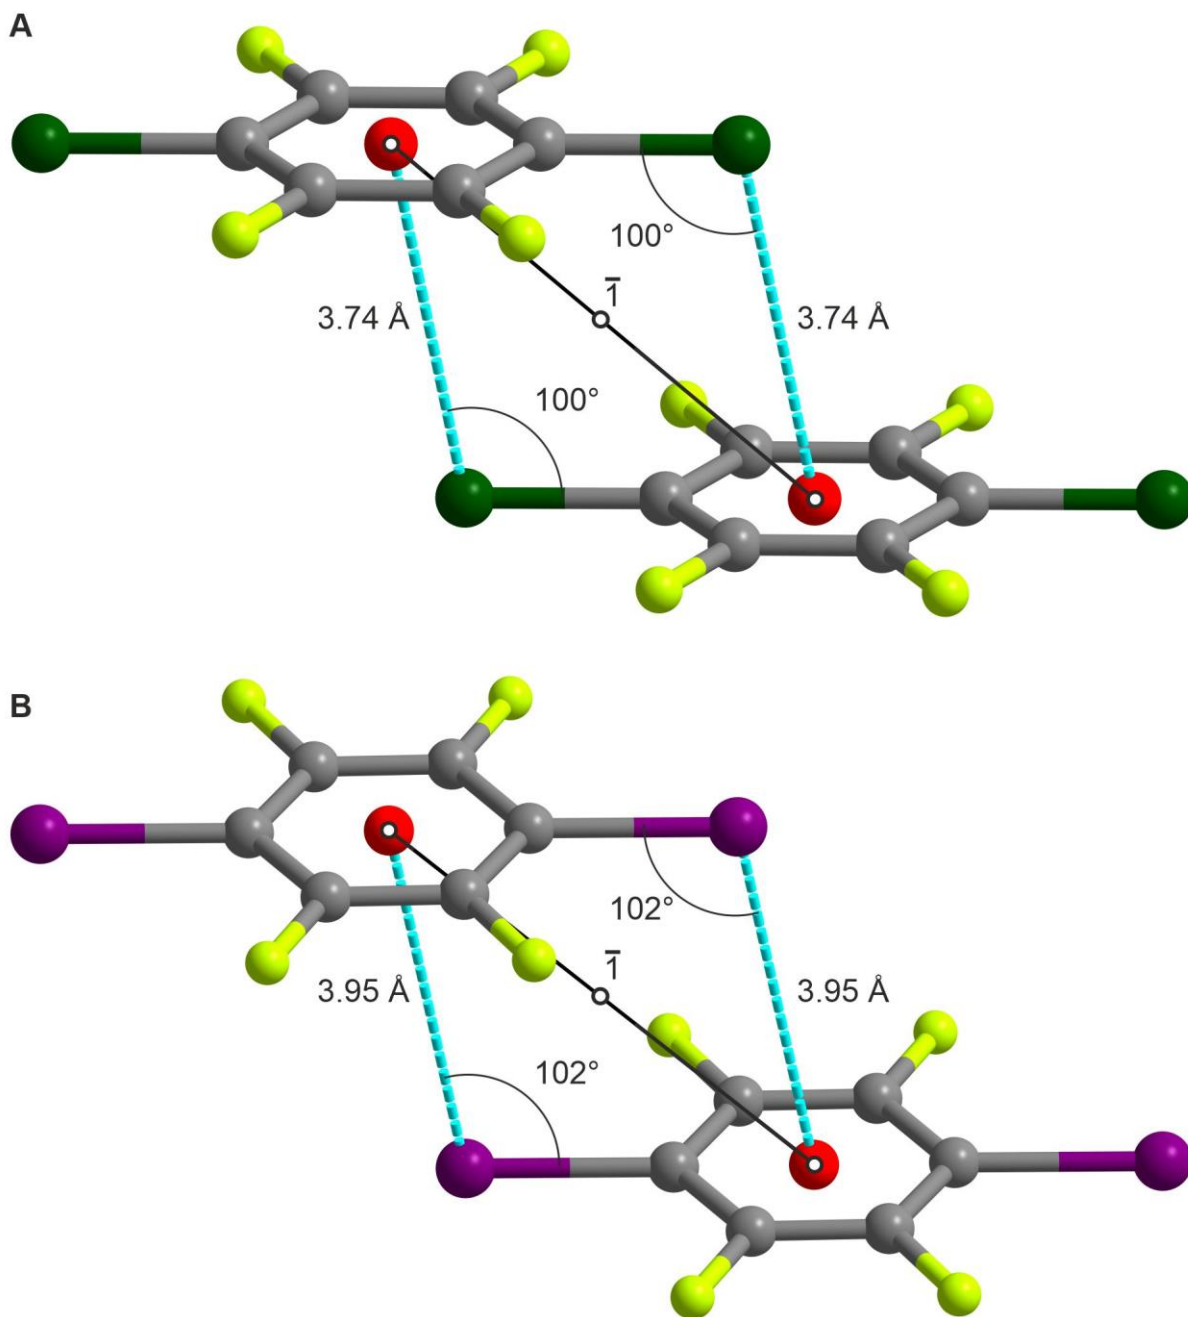

**Fig. S13.** Closest X... $\pi$ (C<sub>6</sub>-ring) contacts between adjacent interacting molecules in the structures of **A** *p*-C<sub>6</sub>F<sub>4</sub>Br<sub>2</sub> at 100 K and **B** *p*-C<sub>6</sub>F<sub>4</sub>I<sub>2</sub> at 180 K drawn from the CIF data from references 31 and 32 respectively. Atoms are coloured as follows: C (grey), F (light green), Br (dark green), and I (purple). The motif is identical to that seen in the form of *p*-C<sub>6</sub>F<sub>4</sub>Cl reported here, as shown in Figs. 4 and S7. Crystallographic inversion symmetry is shown with black open circles and the centre of mass of each molecule is shown with red spheres. However, in marked contrast to *p*-C<sub>6</sub>F<sub>4</sub>Cl<sub>2</sub>, the molecules do not lie in sheets as in Fig. S8.

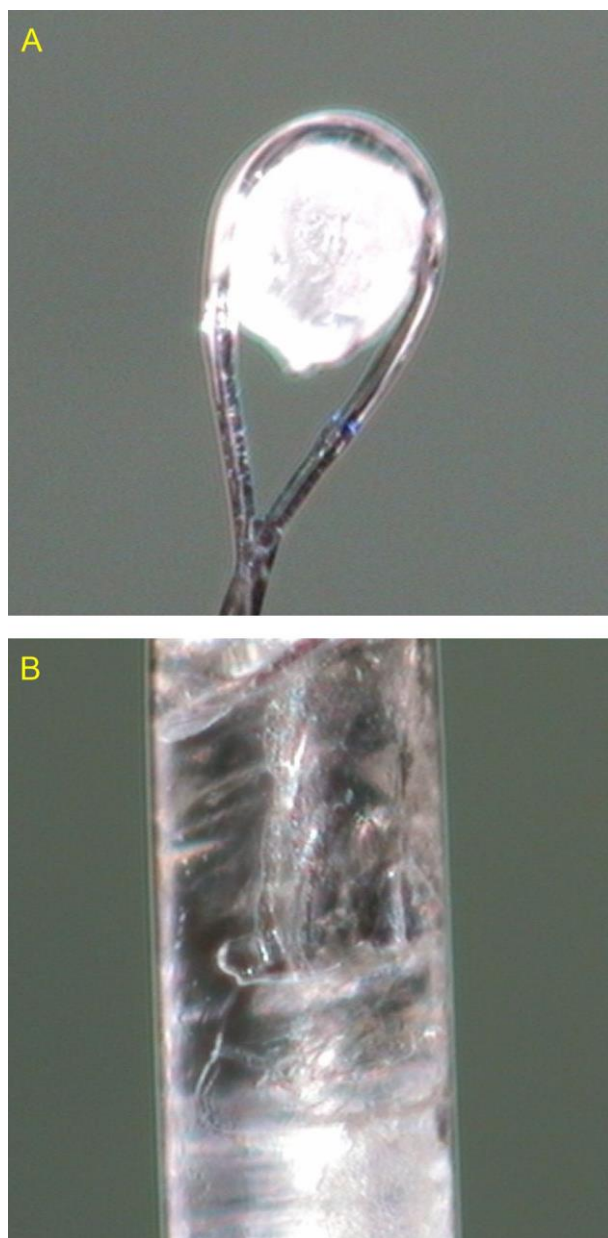

**Fig. S14.** Photograph of the samples measured by SXD in this study: **A** (*top*) is a crystal of *p*-C<sub>6</sub>F<sub>4</sub>Cl<sub>2</sub> on a 20  $\mu$ m nylon loop (nominal  $\varnothing$  0.3 mm) and **B** (*bottom*) is solid C<sub>6</sub>F<sub>5</sub>Cl in a 0.3 mm (nominal  $\varnothing$ ) capillary.
